# Supplementary material
Source: HighWire-hosted journal article supplement (https://rapm.bmj.com/content/48/8/414)

### Importance of Neuromodulation Topics – Program Director Ranking

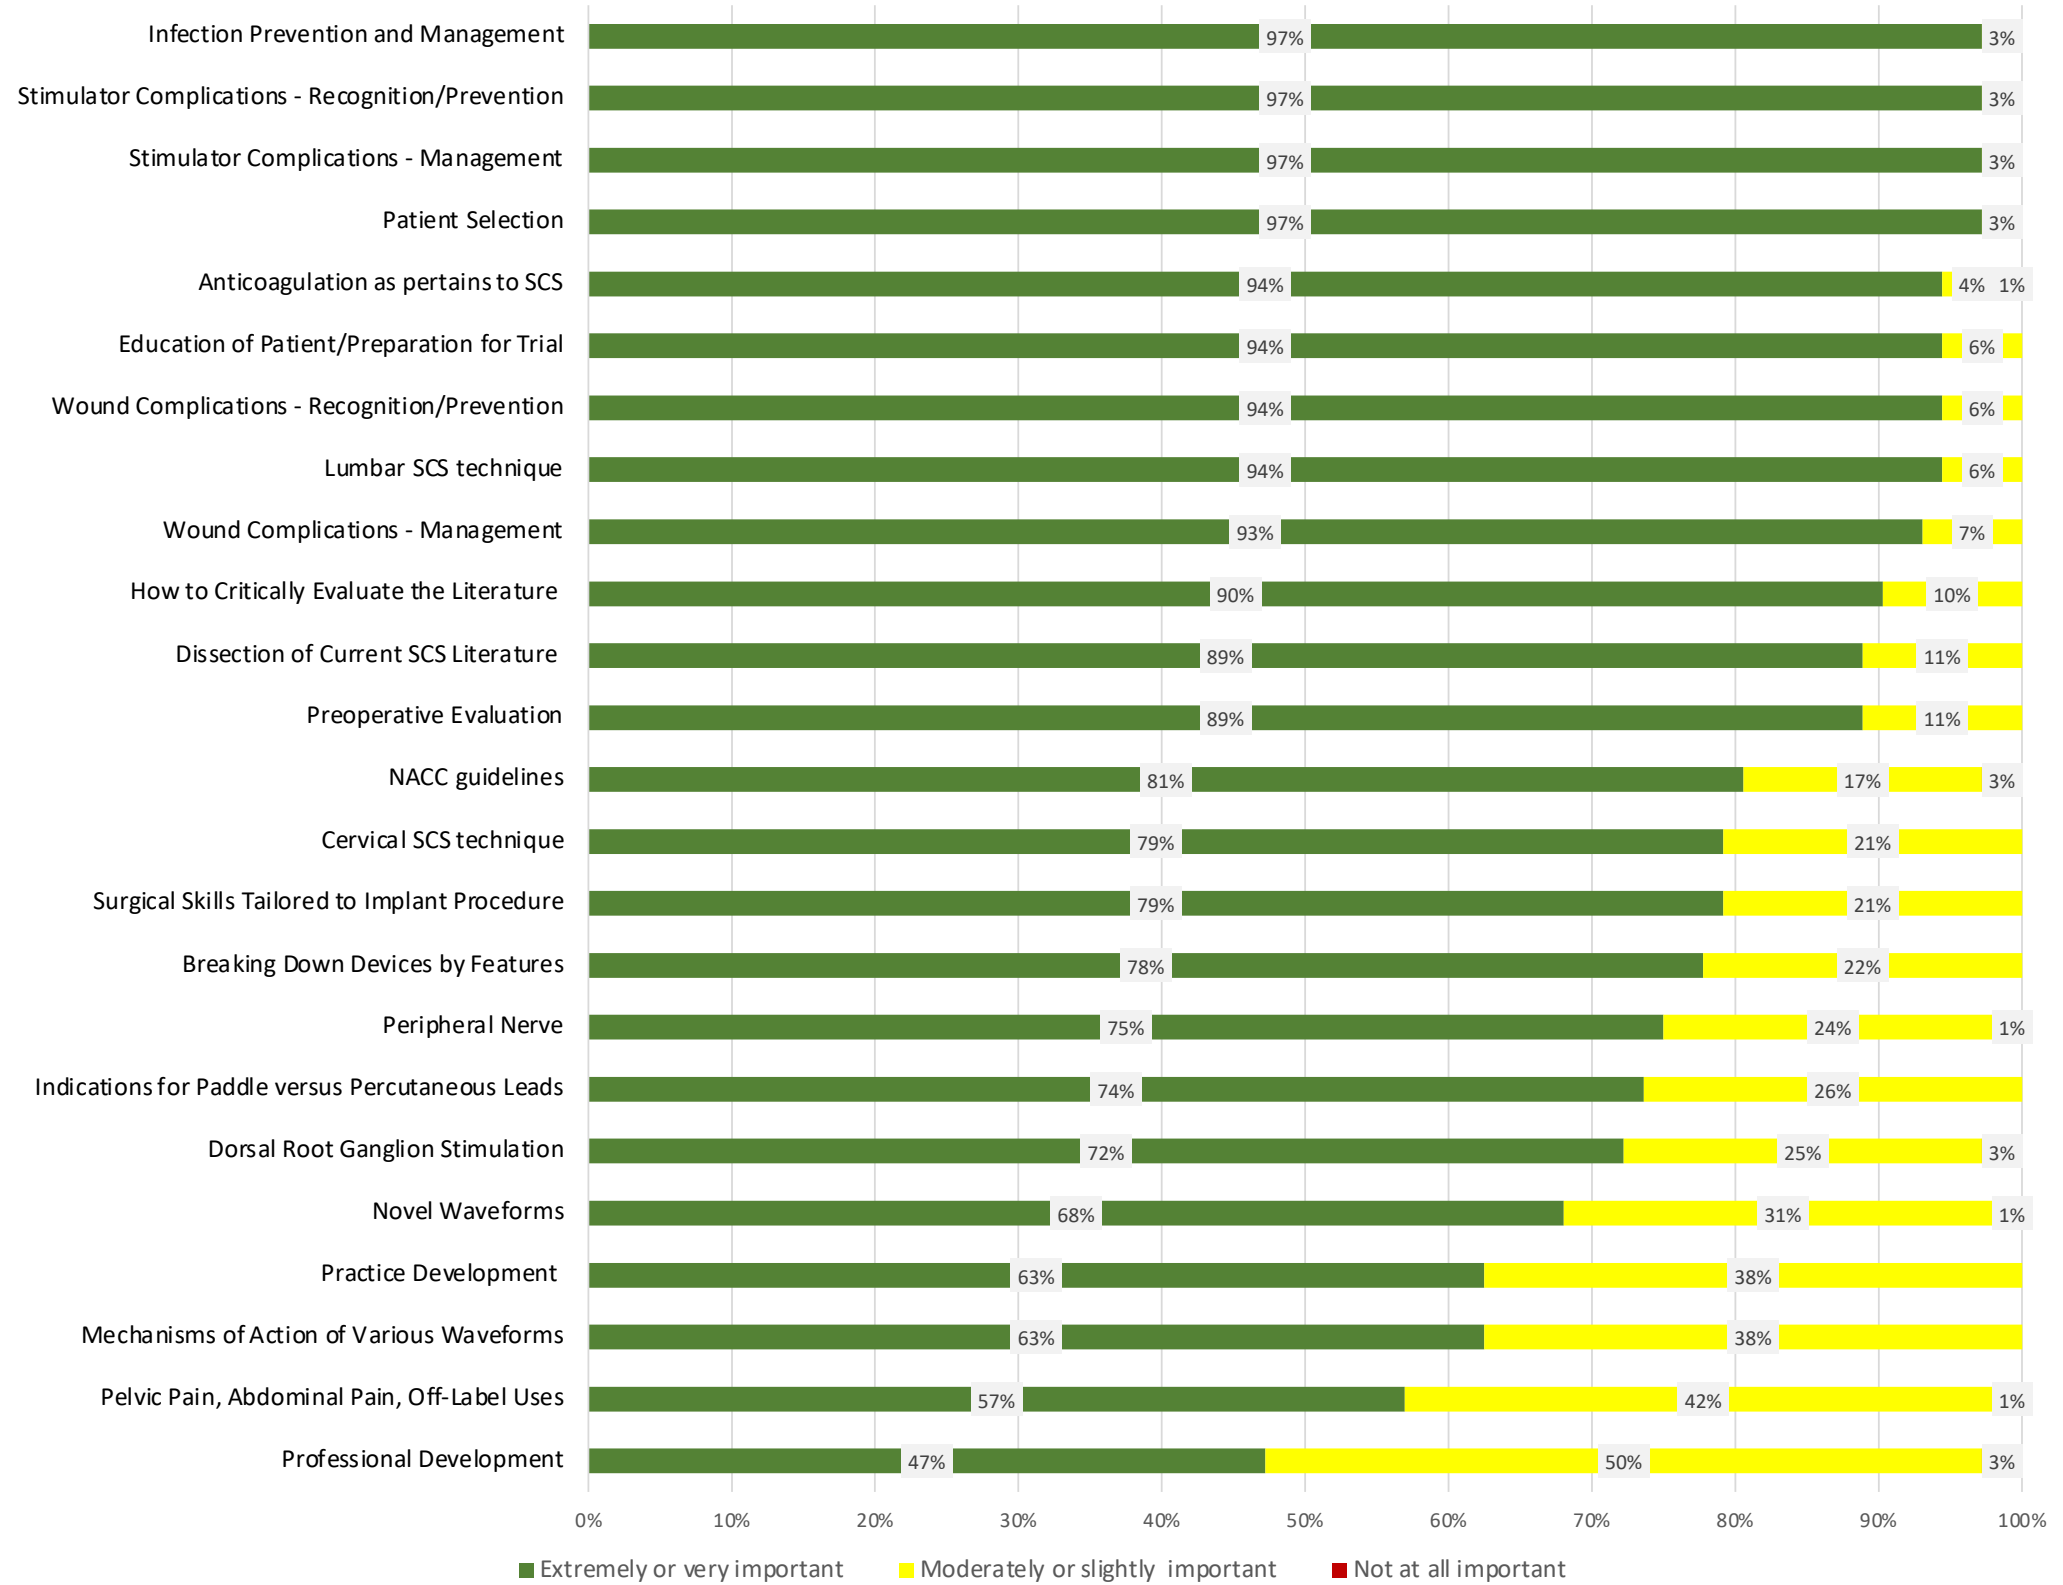

Supplement: inline-supplementary-material-1 [file inline-supplementary-material-1.pdf]

### Importance of Neuromodulation Topics - Fellow Ranking

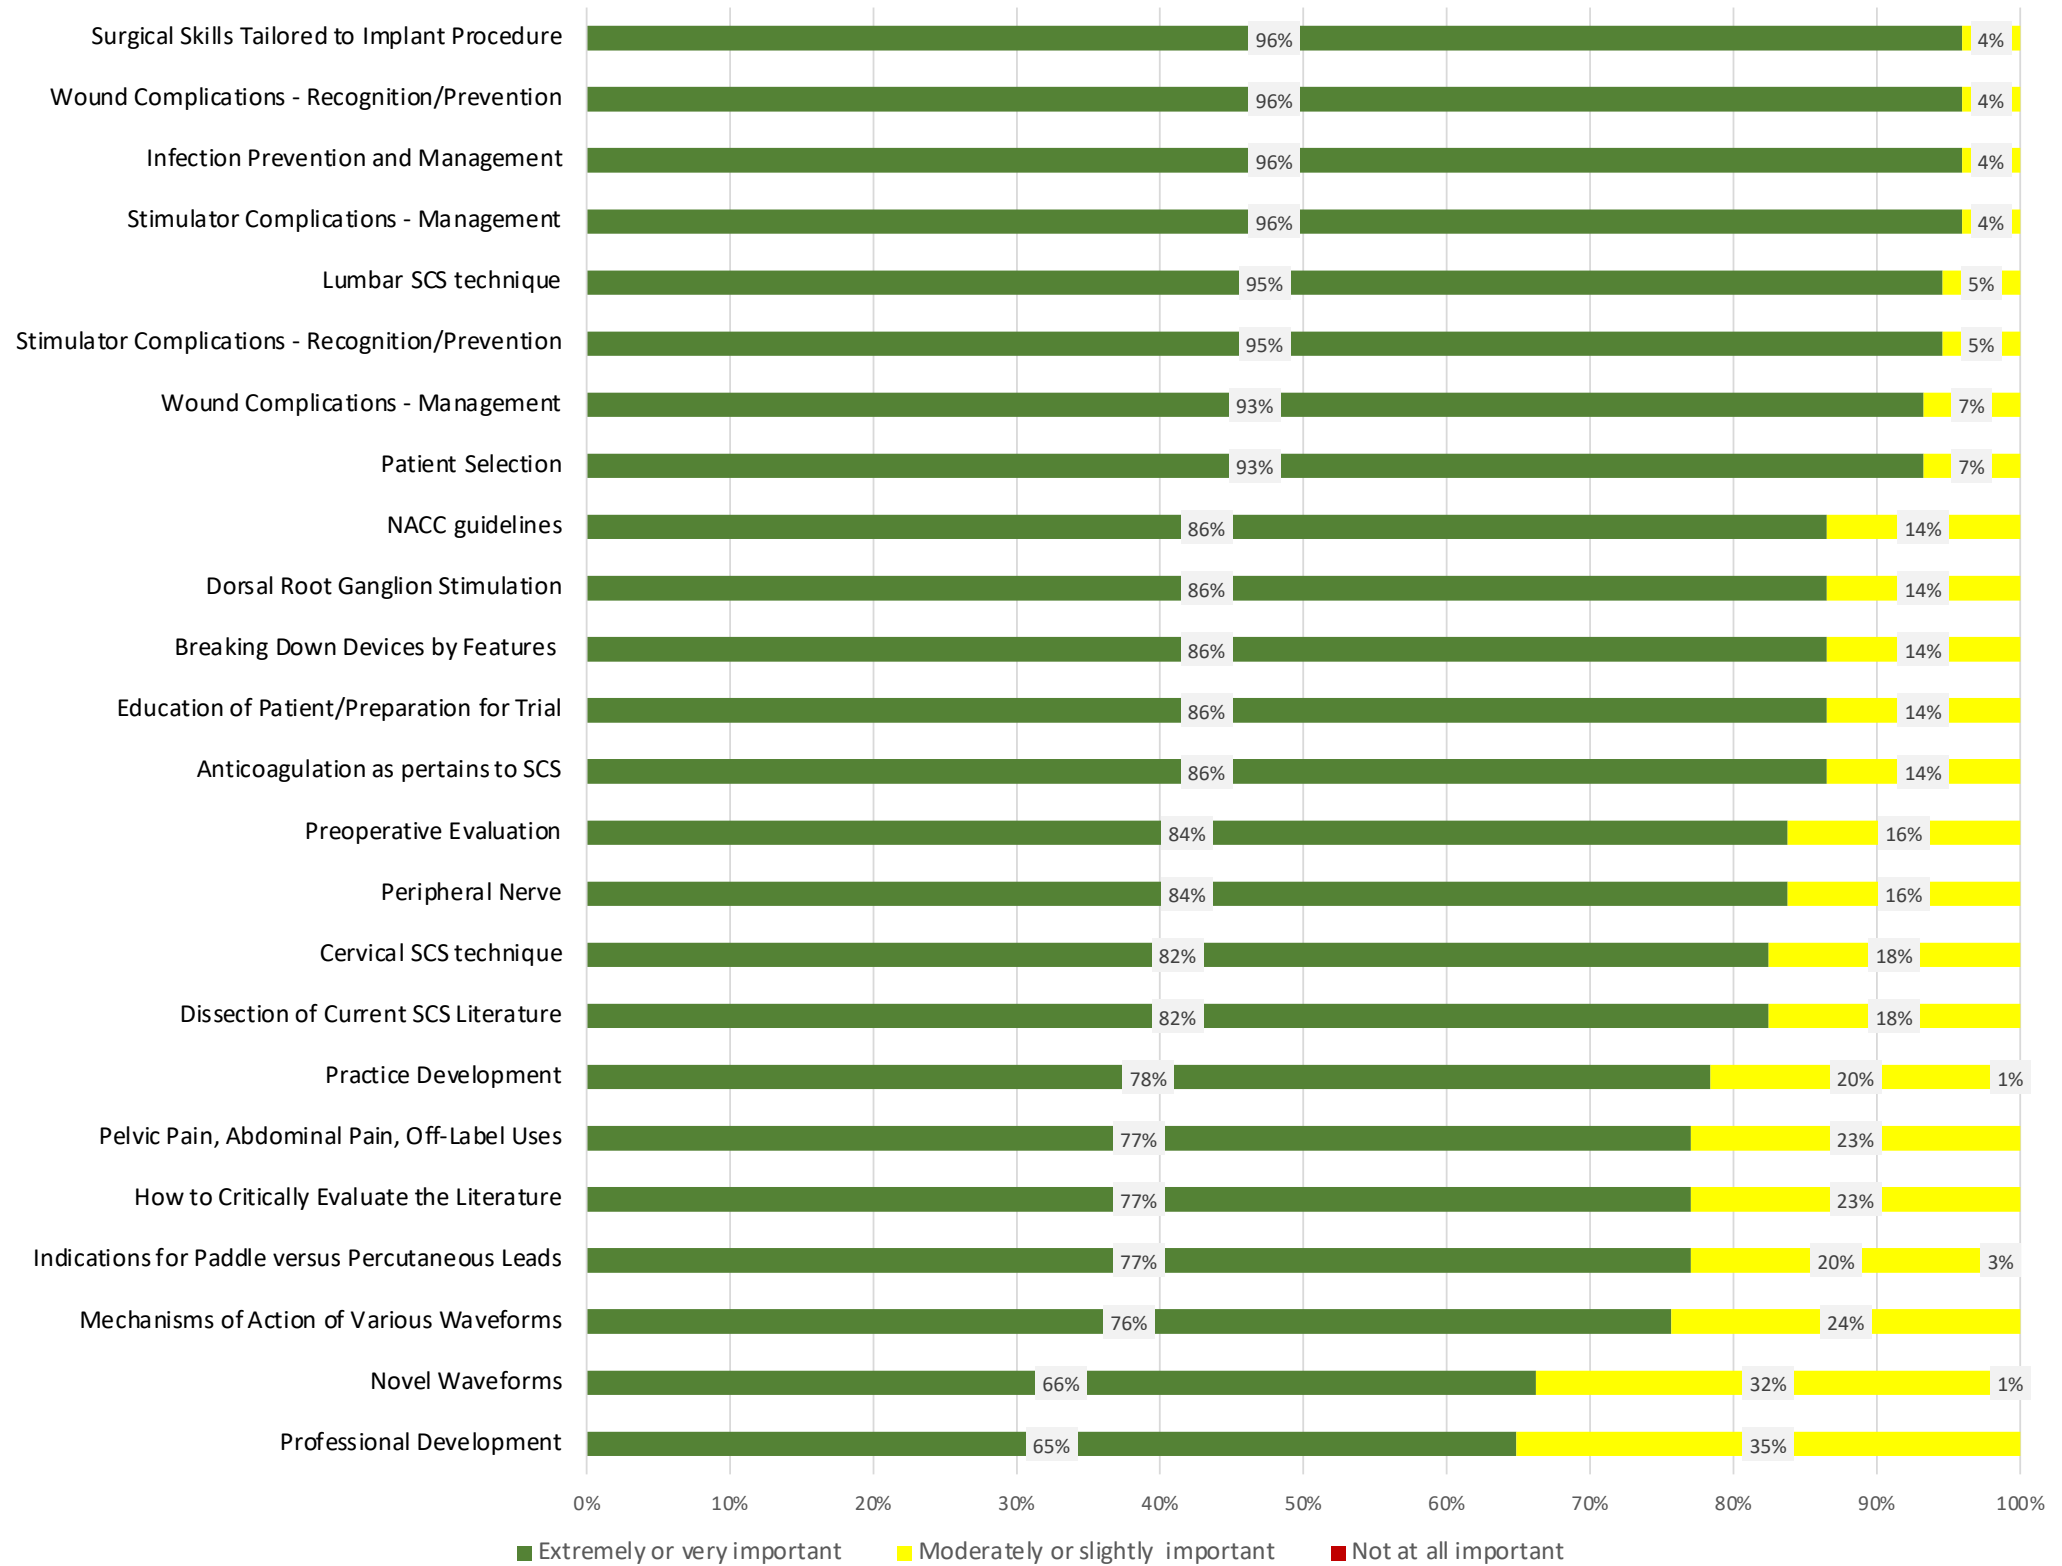

Supplement: inline-supplementary-material-2 [file inline-supplementary-material-2.pdf]
